# Supplementary material for: Comparison of postoperative outcomes of mini percutaneous nephrolithotomy and standard percutaneous nephrolithotomy: a meta-analysis
Source: Springer Nature journal article supplement (doi:10.1007/s00240-022-01349-8), 2022-08-11
Supplement: MOESM1 [file 23357742]

## Jadad Scale: Randomized Controlled Trial

| Study               | Was the study described as randomized? | Was the study described as double blind? | Was there a description of withdrawals and dropouts? | Total Score |
|---------------------|----------------------------------------|------------------------------------------|------------------------------------------------------|-------------|
| Bozzini, G. 2020    | 2                                      | 0                                        | 1                                                    | 3           |
| Cheng, F. 2010      | 1                                      | 0                                        | 1                                                    | 2           |
| Du, C. 2018         | 1                                      | 0                                        | 1                                                    | 2           |
| Guler, A. 2019      | 2                                      | 0                                        | 1                                                    | 3           |
| Kandemir, E. 2020   | 1                                      | 0                                        | 1                                                    | 2           |
| Kukreja, R. A. 2018 | 2                                      | 0                                        | 1                                                    | 3           |
| Sakr, A. 2017       | 2                                      | 0                                        | 1                                                    | 3           |
| Tepeler, A. 2014    | 2                                      | 0                                        | 1                                                    | 3           |
| Thakur, A. 2021     | 1                                      | 0                                        | 1                                                    | 2           |
| Zeng, G. 2021       | 2                                      | 2                                        | 1                                                    | 5           |
| Zhong, W. 2011      | 1                                      | 0                                        | 1                                                    | 2           |

Supplementary Table 1 Jadad Scale Randomized Controlled Trial
