# Supplementary material for: Comparison of postoperative outcomes of mini percutaneous nephrolithotomy and standard percutaneous nephrolithotomy: a meta-analysis
Source: Springer Nature journal article supplement (doi:10.1007/s00240-022-01349-8), 2022-08-11
Supplement: MOESM2 [file 23357742]

Table 1. Characteristics of included studies

| study                  | Design  | Procedures    | Sample size | Age (year)      | Sex (M/F) | side (R/L) | BMI, kg/m <sup>2</sup> | Stone Size, mm |
|------------------------|---------|---------------|-------------|-----------------|-----------|------------|------------------------|----------------|
| Bozzini, G. 2020       | RCT     | Mini-PCNL     | 47          | 55.8            | 20/27     | 22/25      |                        | 16.82          |
|                        |         | Standard-PCNL | 44          | 53.3            | 23/21     | 25/19      |                        | 16.38          |
| Cheng, F. 2010         | RCT     | Mini-PCNL     | 72          | 37.2            | 39/33     | 43/29      |                        |                |
|                        |         | Standard-PCNL | 115         | 39.6            | 63/52     | 67/48      |                        |                |
| Du, C. 2018            | RCT     | Mini-PCNL     | 304         | 41.2±<br>16.9   | 181/123   | 147/157    |                        |                |
|                        |         | Standard-PCNL | 297         | 44.5±<br>18.7   | 179/118   | 151/146    |                        |                |
| Guler, A. 2019         | RCT     | Mini-PCNL     | 51          | 46.9±<br>13.7   | 29/22     | 29/22      | 28.5±<br>5.6           | 38.7±<br>13.1  |
|                        |         | Standard-PCNL | 46          | 47.4±<br>13.9   | 23/23     | 25/21      | 29.6±<br>5.9           | 42.8±<br>22.5  |
| Kandemir, E. 2020      | RCT     | Mini-PCNL     | 76          | 47.0±<br>13.9   | 50/26     | 40/36      | 28.6±<br>5.4           | 32.6±<br>8.1   |
|                        |         | Standard-PCNL | 72          | 46.7±<br>14.2   | 48/24     | 35/47      | 28.4±<br>5.6           | 33.1±<br>10.9  |
| Kukreja, R. A. 2018    | RCT     | Mini-PCNL     | 61          | 41.95±<br>13.53 |           | 33/28      | 27.1±<br>5.87          | 20.6±<br>3.47  |
|                        |         | Standard-PCNL | 62          | 40.3±<br>14.2   |           | 30/32      | 25.54<br>±3.58         | 21.5±<br>3.53  |
| Sakr, A. 2017          | RCT     | Mini-PCNL     | 75          | 43.8            | 40/35     | 51/36      | 28.4                   | 27             |
|                        |         | Standard-PCNL | 75          | 40.2            | 52/23     | 33/48      | 27.8                   | 26             |
| Tepeler, A. 2014       | RCT     | Mini-PCNL     | 10          | 47.2            | 4/6       |            | 27.5                   | 19.9           |
|                        |         | Standard-PCNL | 10          | 44.3            | 6/4       |            | 27.8                   | 21.9           |
| Thakur, A. 2021        | RCT     | Mini-PCNL     | 30          | 34.5±<br>16.32  | 21/9      |            | 26.32<br>±5.10         | 17.9±5         |
|                        |         | Standard-PCNL | 30          | 32.4±<br>12.6   | 17/13     |            | 25±<br>5.16            | 19.4±<br>5.3   |
| Zeng, G. 2021          | RCT     | Mini-PCNL     | 992         | 51              | 526/466   | 500/492    | 24.4                   | 29             |
|                        |         | Standard-PCNL | 988         | 51              | 531/457   | 487/501    | 24.7                   | 29             |
| Zhong, W. 2011         | RCT     | Mini-PCNL     | 29          | 41              | 14/15     |            |                        |                |
|                        |         | Standard-PCNL | 25          | 38              | 11/14     |            |                        |                |
| Abdelhafez, M. F. 2016 | Non-RCT | Mini-PCNL     | 71          | 52              | 37/34     | 29/42      | 26.2                   | 38.6           |
|                        |         | Standard-PCNL | 62          | 58              | 31/31     | 21/41      | 26.4                   | 38.2           |
| ElSheemy, M. S. 2019   | Non-RCT | Mini-PCNL     | 378         | 37.08±<br>12.62 | 137/241   | 206/172    | 27.2±<br>2.22          |                |
|                        |         | Standard-PCNL | 151         | 43.42±<br>13.21 | 58/93     | 75/76      | 27.03<br>±2.16         |                |
| Hamamoto, S. 2014      | Non-RCT | Mini-PCNL     | 19          | 48.9            | 12/7      | 5/14       | 24.8                   |                |
|                        |         | Standard-PCNL | 82          | 53.2            | 66/16     | 22/60      | 24.6                   |                |
| Khadgi, S. 2021        | Non-RCT | Mini-PCNL     | 83          | 43.7±<br>13.9   | 44/39     | 36/47      | 29±<br>3.3             |                |
|                        |         | Standard-PCNL | 70          | 51.9±<br>9.7    | 32/38     | 21/41      | 34±6                   |                |

|                               |         |               |     |               |       |       |              |         |
|-------------------------------|---------|---------------|-----|---------------|-------|-------|--------------|---------|
| <b>Knoll, T.<br/>2010</b>     | Non-RCT | Mini-PCNL     | 25  | 52±<br>11.6   | 16/9  |       | 27±<br>3.5   | 18±3.3  |
|                               |         | Standard-PCNL | 25  | 48±<br>15.5   | 17/8  |       | 29±<br>5.6   | 22±4.25 |
| <b>Li, L. Y.<br/>2010</b>     | Non-RCT | Mini-PCNL     | 93  | 51.5          | 56/37 | 48/45 |              | 28.6    |
|                               |         | Standard-PCNL | 72  | 49.2          | 43/29 | 31/41 |              | 30.4    |
| <b>Mishra, S.<br/>2011</b>    | Non-RCT | Mini-PCNL     | 26  | 42.2±<br>19.8 | 18/8  | 8/19  | 23.8±<br>2.6 |         |
|                               |         | Standard-PCNL | 26  | 48.2±<br>16.8 | 18/8  | 10/18 | 22.6±<br>2.7 |         |
| <b>Sabnis, R.<br/>B. 2020</b> | Non-RCT | Mini-PCNL     | 11  | 40.2±<br>15.1 | 5/6   |       |              |         |
|                               |         | Standard-PCNL | 20  | 49.2±<br>11.5 | 16/4  |       |              |         |
| <b>Wu, C. 2017</b>            | Non-RCT | Mini-PCNL     | 114 | 47.6±<br>8.2  | 69/45 | 59/55 | 23.0±<br>2.7 | 34±10   |
|                               |         | Standard-PCNL | 114 | 48.1±<br>7.9  | 68/46 | 55/59 | 22.8±<br>2.8 | 33±11   |

---
