# Supplementary material for: Comparison of postoperative outcomes of mini percutaneous nephrolithotomy and standard percutaneous nephrolithotomy: a meta-analysis
Source: Springer Nature journal article supplement (doi:10.1007/s00240-022-01349-8), 2022-08-11
Supplement: MOESM3 [file 23357742]

## Newcastle-Ottawa Quality Assessment Scale: Cohort Studies

| Study                | Selection                                |                                     |                                       | Demonstration that outcome of interest was not present at start of study | Comparability                                                   |                       | Outcome                                         |                                  | Total Score |
|----------------------|------------------------------------------|-------------------------------------|---------------------------------------|--------------------------------------------------------------------------|-----------------------------------------------------------------|-----------------------|-------------------------------------------------|----------------------------------|-------------|
|                      | Representativeness of the exposed cohort | Selection of the non exposed cohort | Ascertainment of exposure to implants |                                                                          | Comparability of cohorts on the basis of the design or analysis | Assessment of outcome | Was follow up long enough for outcomes to occur | Adequacy of follow up of cohorts |             |
| ElSheemy, M. S. 2019 | ☆                                        | /                                   | ☆                                     | ☆                                                                        | ☆                                                               | ☆                     | ☆                                               | ☆                                | 7           |
| Knoll, T. 2010       | ☆                                        | /                                   | ☆                                     | ☆                                                                        | ☆                                                               | ☆                     | ☆                                               | ☆                                | 7           |
| Mishra, S. 2011      | ☆                                        | /                                   | ☆                                     | ☆                                                                        | ☆                                                               | ☆                     | ☆                                               | ☆                                | 7           |
| Sabnis, R. B. 2020   | ☆                                        | /                                   | ☆                                     | ☆                                                                        | ☆                                                               | ☆                     | ☆                                               | ☆                                | 7           |
| Wu, C. 2017          | ☆                                        | /                                   | ☆                                     | ☆                                                                        | ☆                                                               | ☆                     | ☆                                               | ☆                                | 7           |

Supplementary Table 3 Newcastle-Ottawa Quality Assessment Scale Cohort Studies
