# Supplementary material for: Comparison of postoperative outcomes of mini percutaneous nephrolithotomy and standard percutaneous nephrolithotomy: a meta-analysis
Source: Springer Nature journal article supplement (doi:10.1007/s00240-022-01349-8), 2022-08-11
Supplement: MOESM9 [file 23357742]

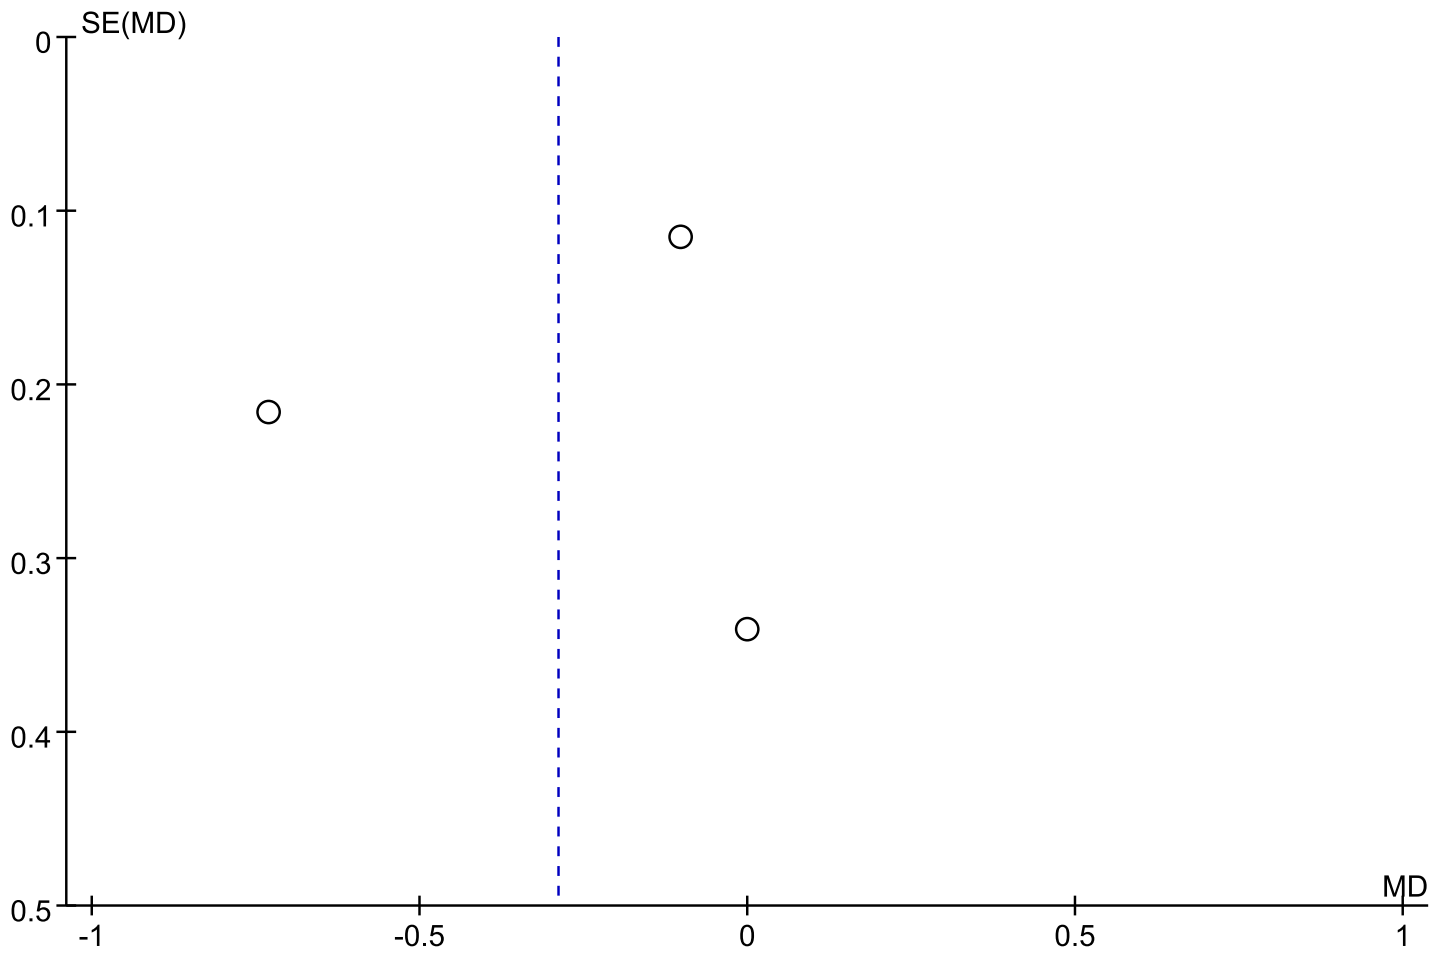

Supplementary Table 9 Funnel plot of VAS
